# Supplementary material for: Investigation of the Antitumor Effects of Tamoxifen and Its Ferrocene-Linked Derivatives on Pancreatic and Breast Cancer Cell Lines
Source: Pharmaceuticals (Basel). 2022 Mar 5;15(3):314. doi: 10.3390/ph15030314 (PMC8950591; doi:10.3390/ph15030314)

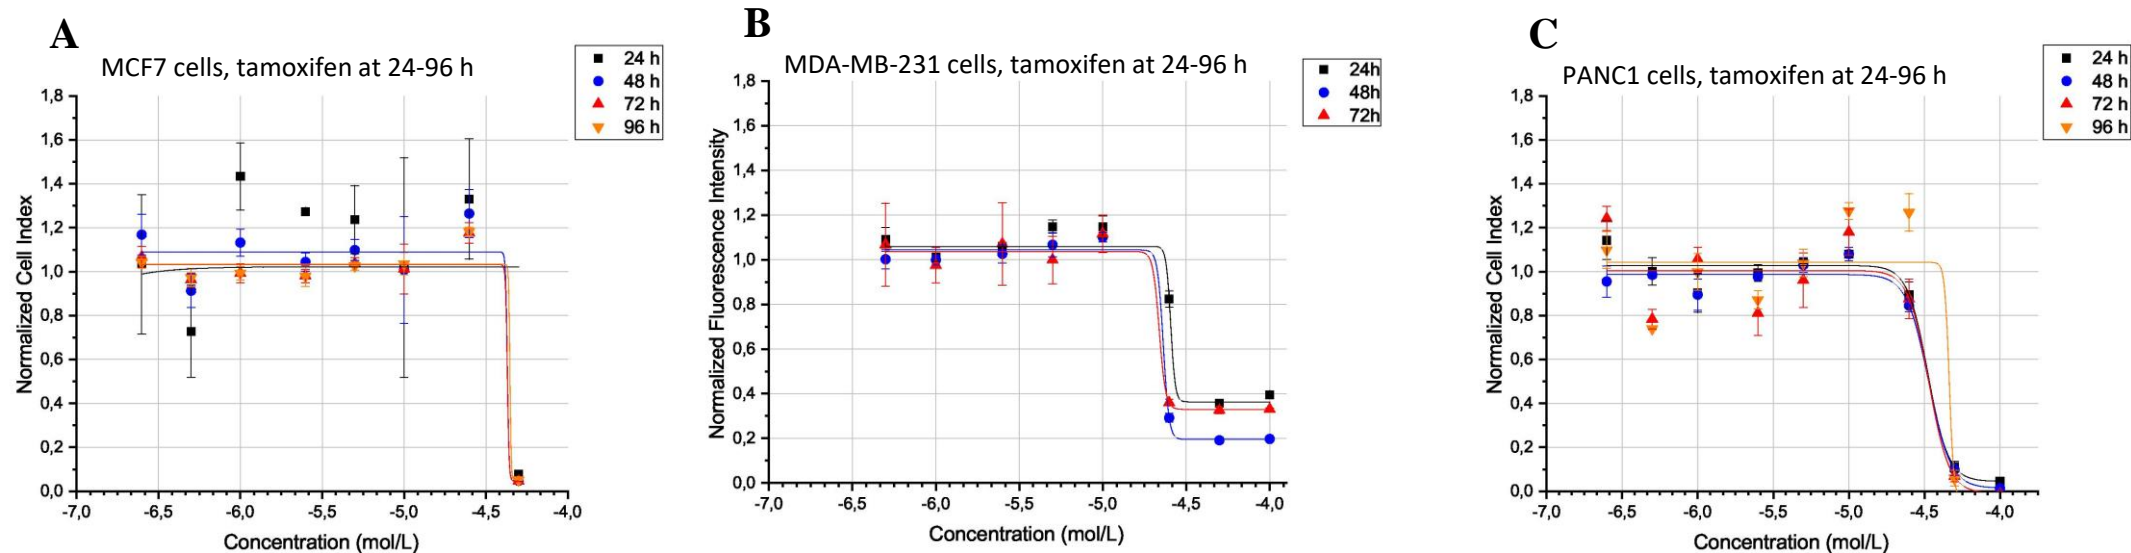

**Figure S3:** IC<sub>50</sub> values of T15 on MCF7 (A), MDA-MB-231 (B) and PANC1 (C) cells. Each cell line was treated with concentrations between 250 nM and 25  $\mu$ M (X-axis, log<sub>10</sub> scale). With each concentration, three parallel samples of the same cells were measured (n=3). Data are given as mean values  $\pm$  standard deviation (SD).

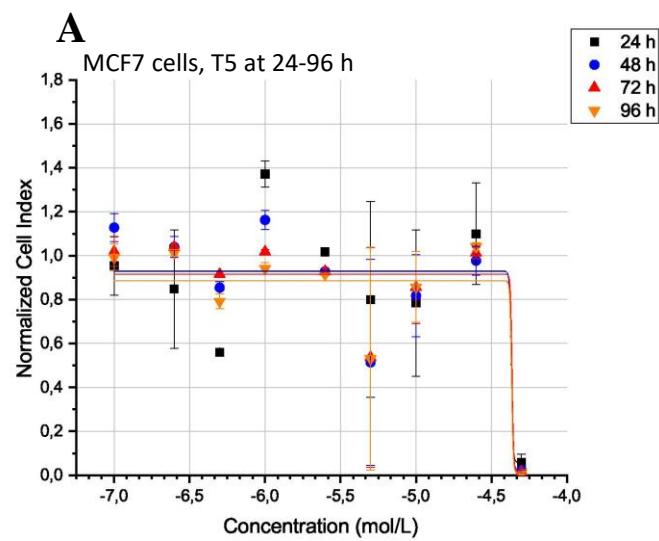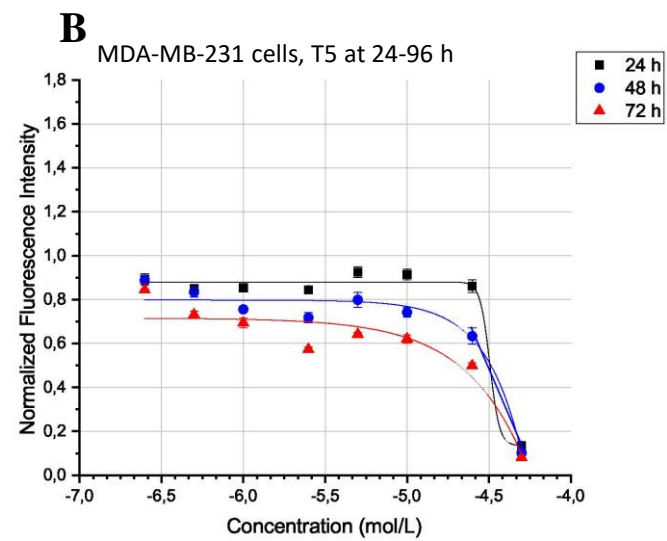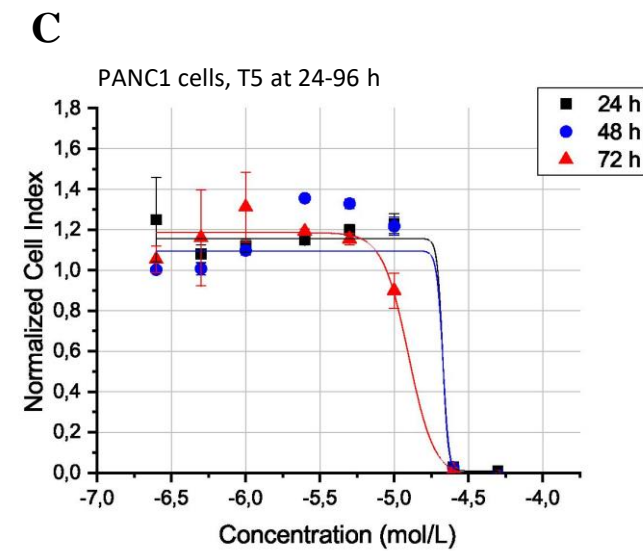

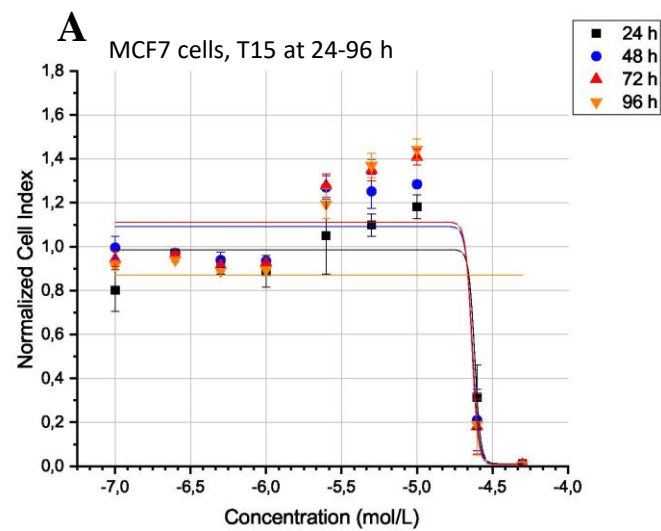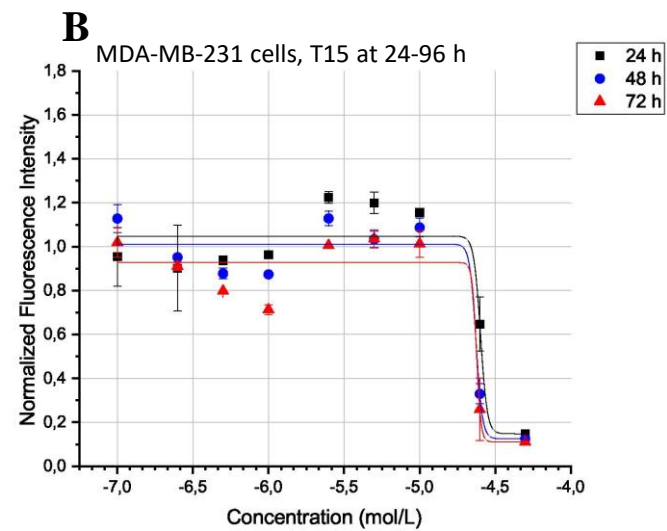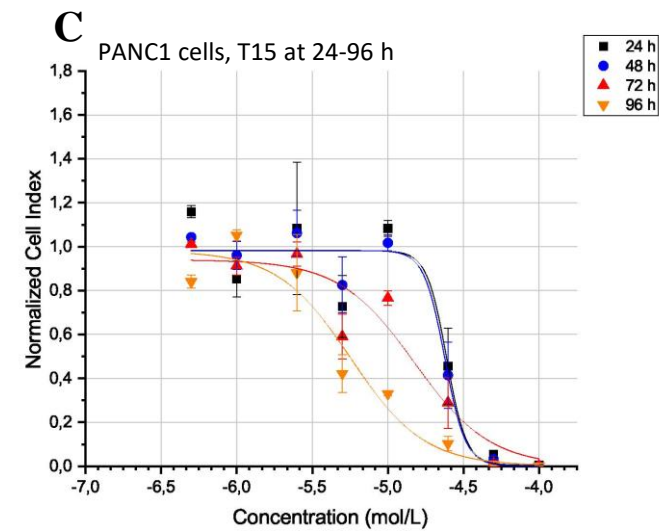

**A**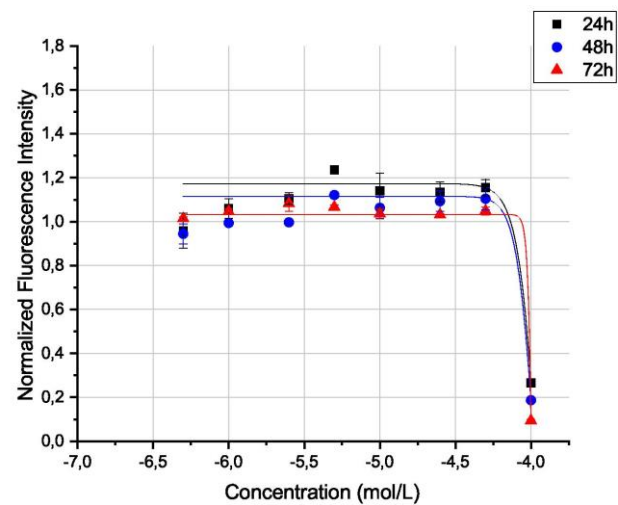**B**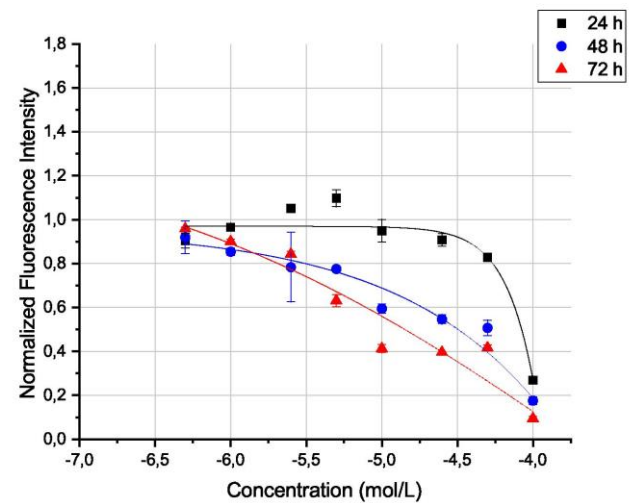**C**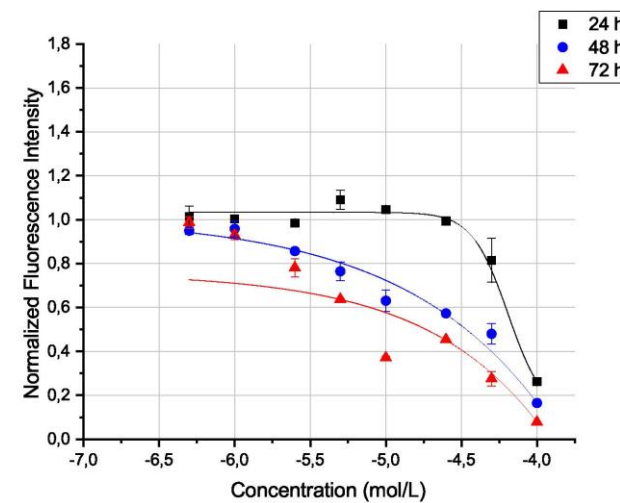

A

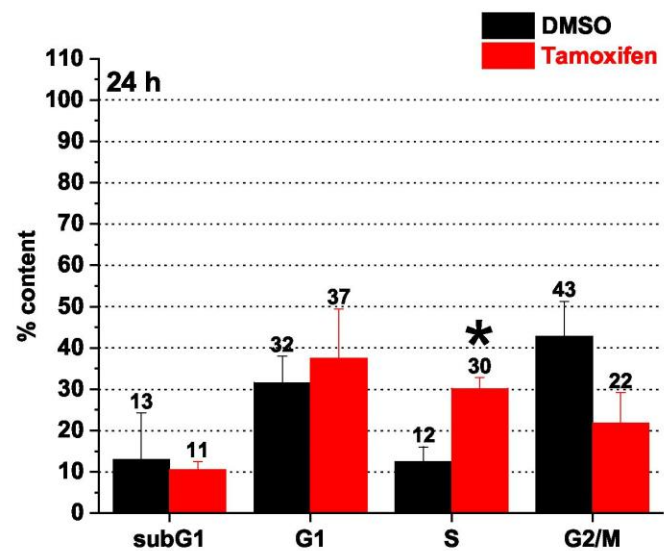

B

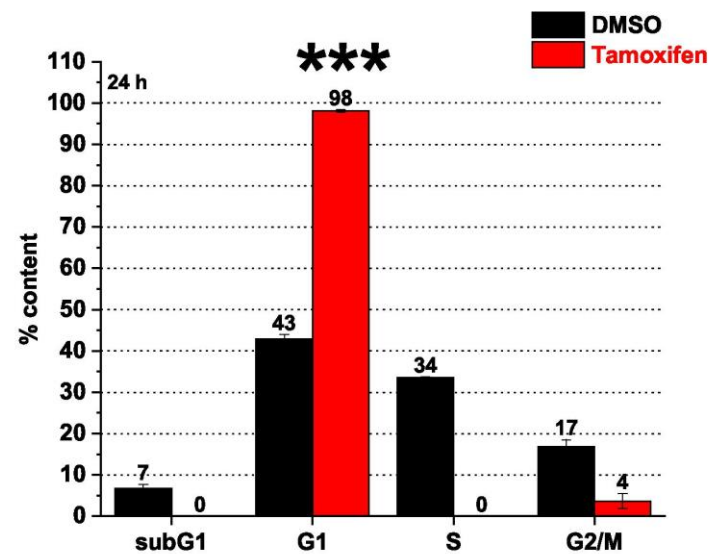

C

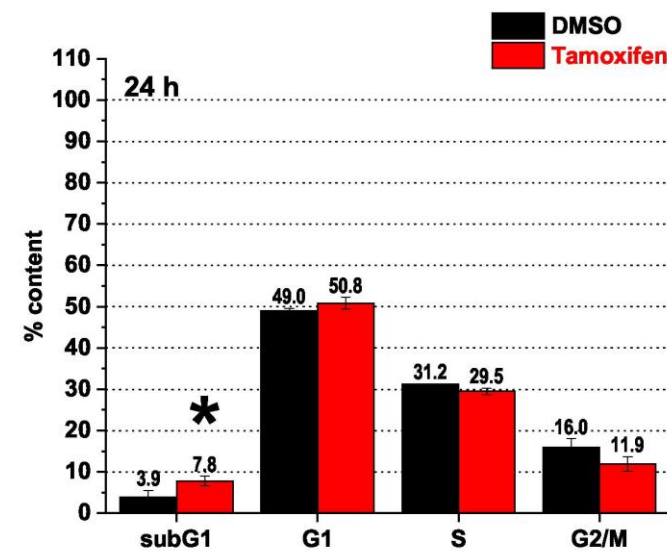

D

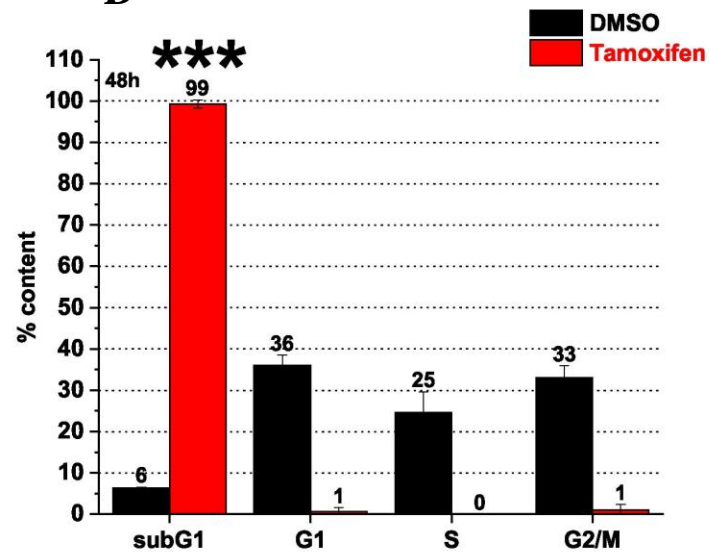

E

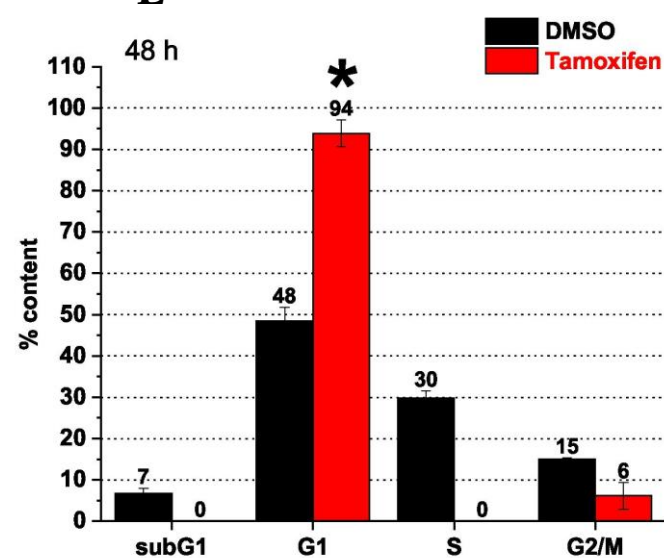

F

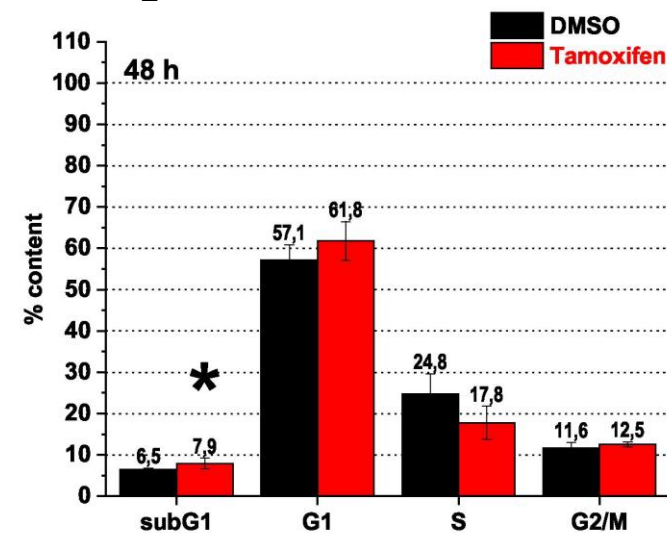

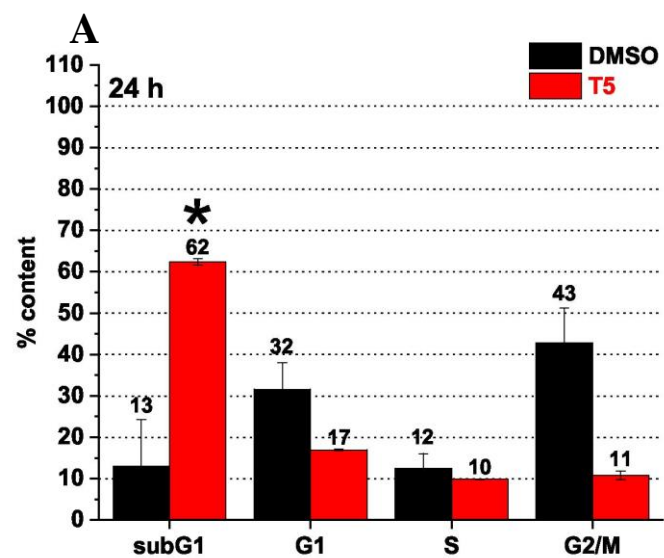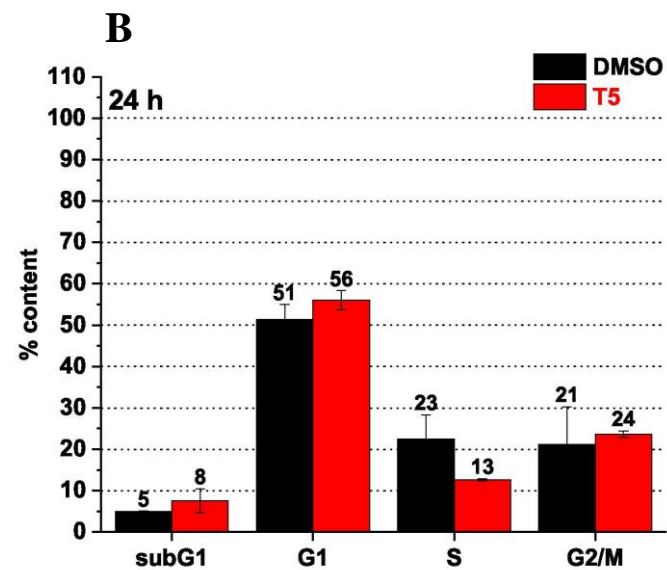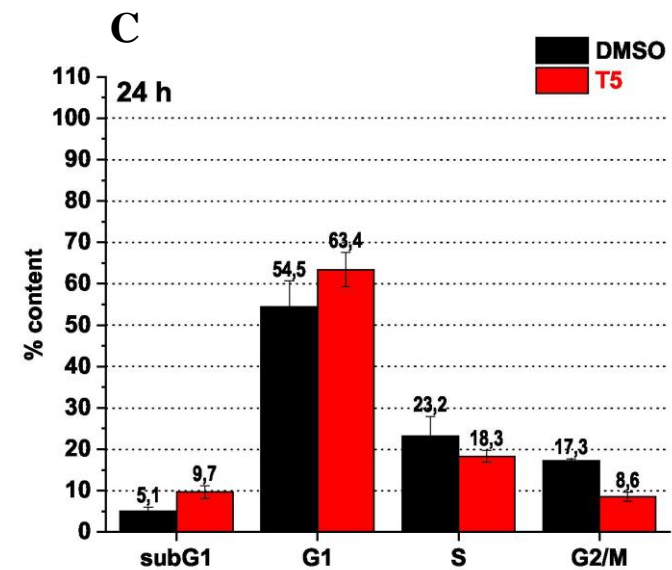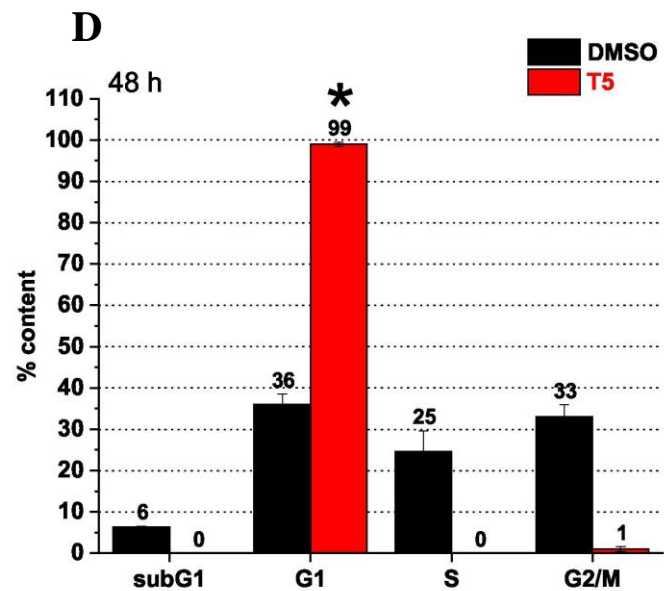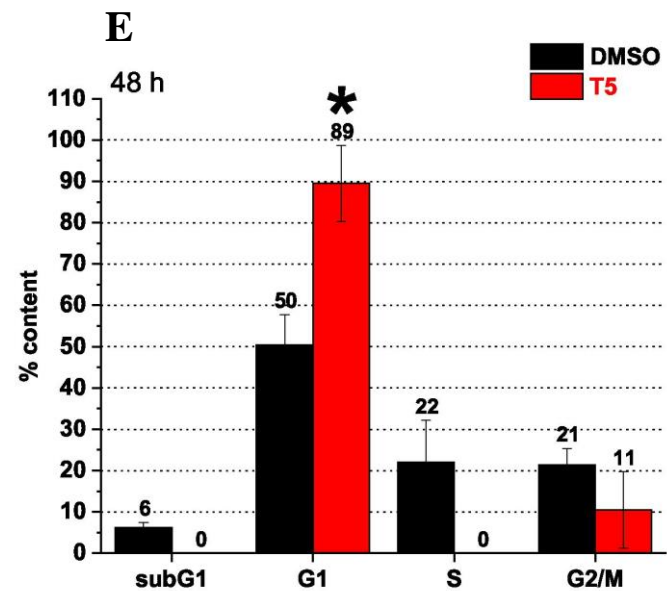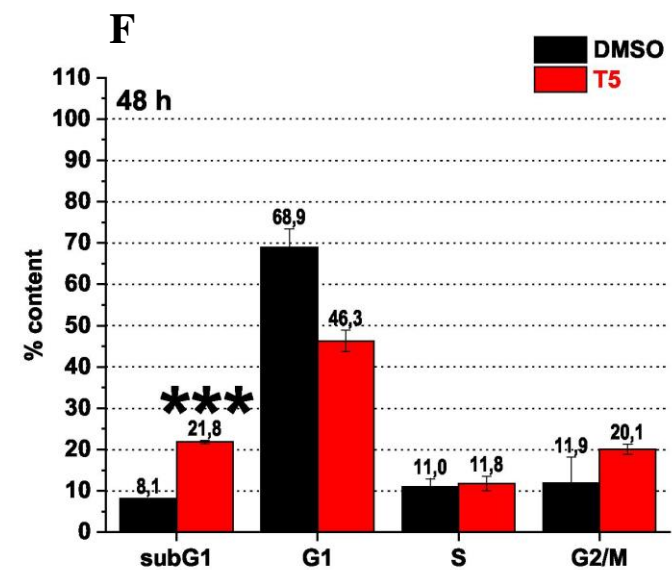

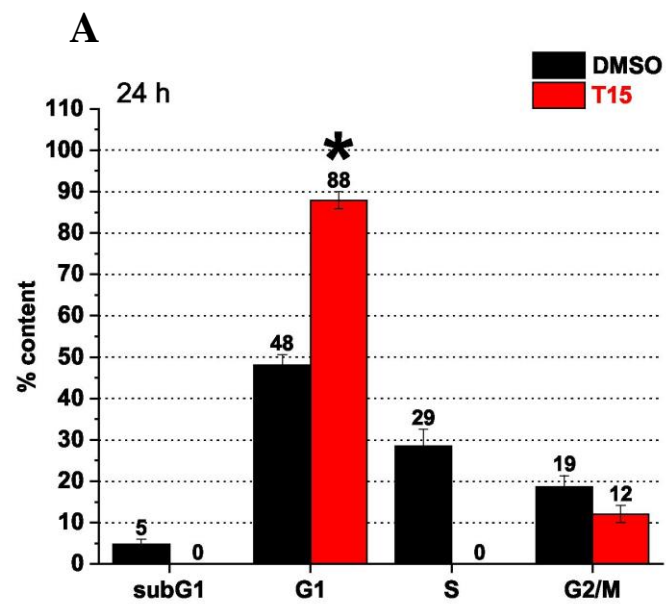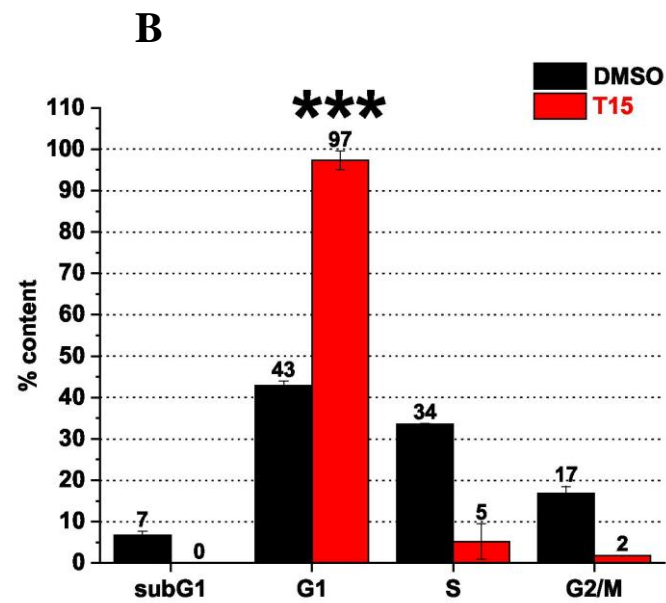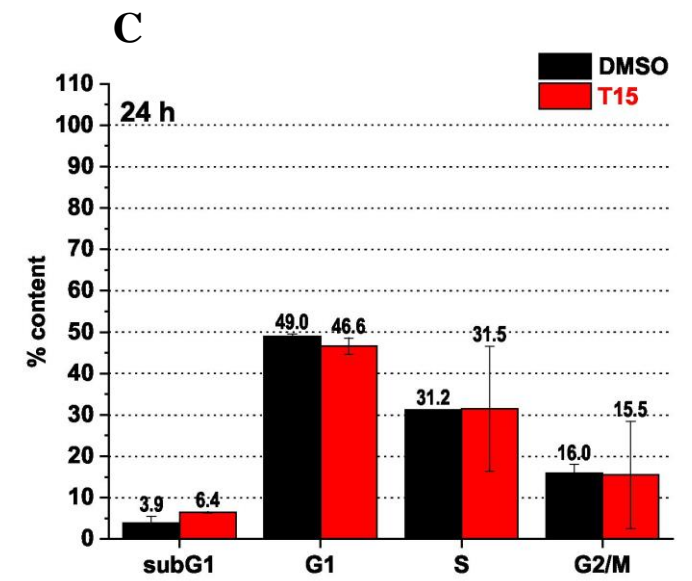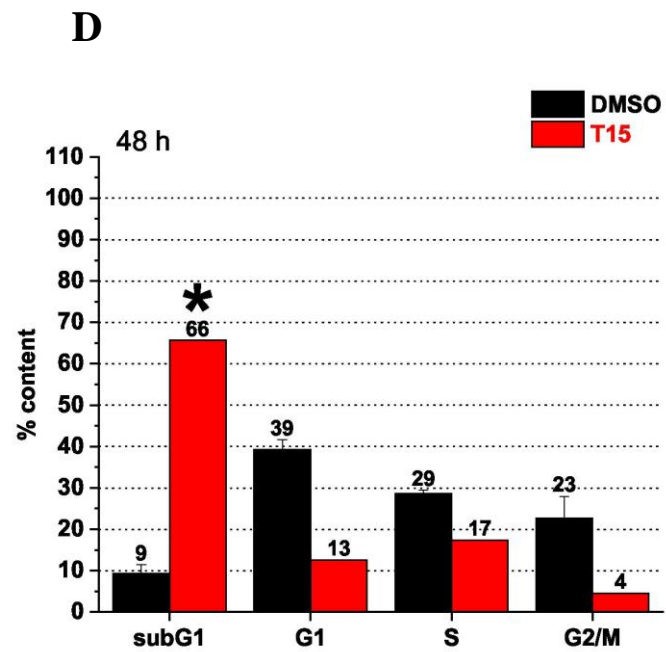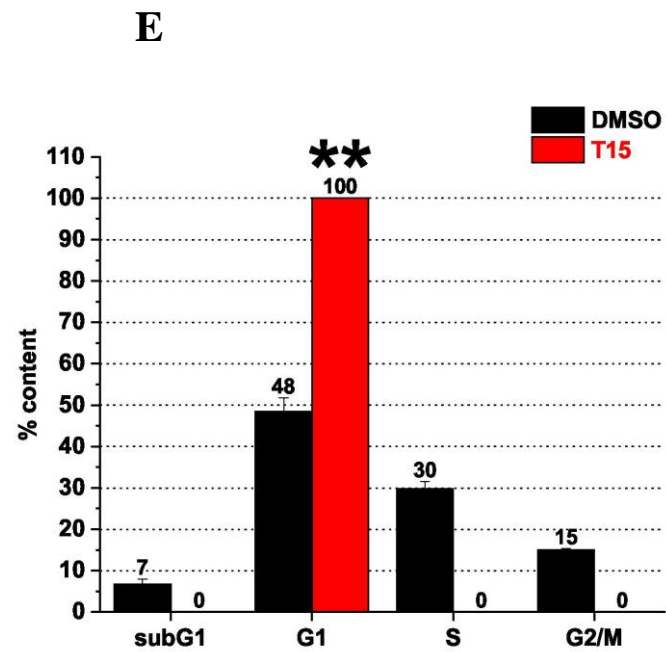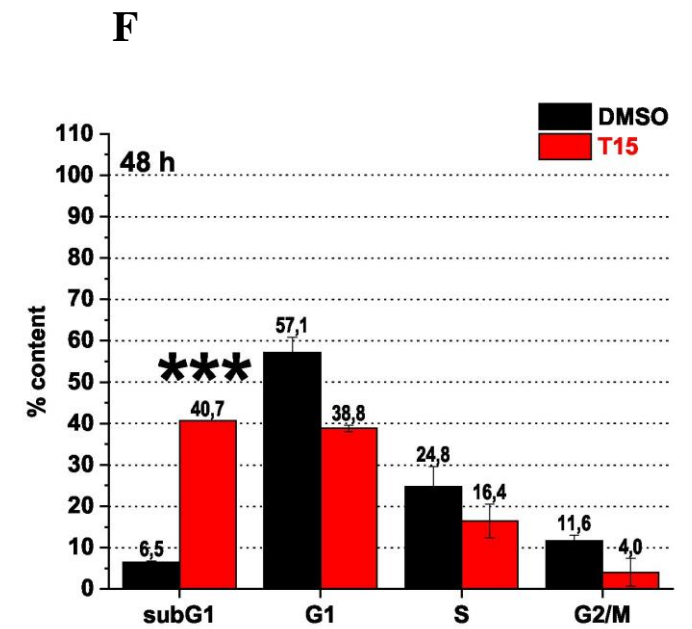

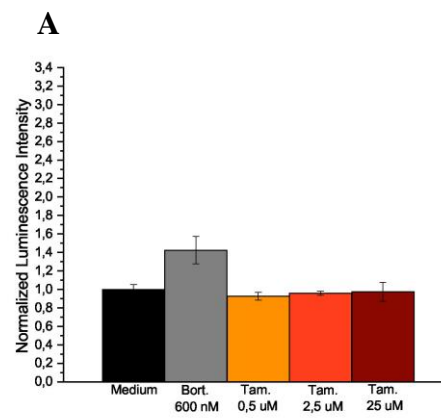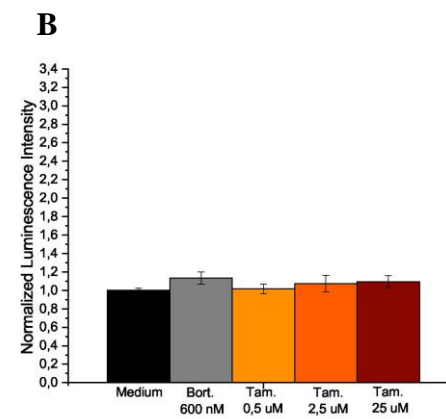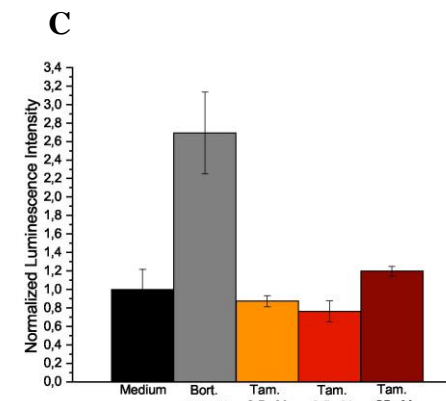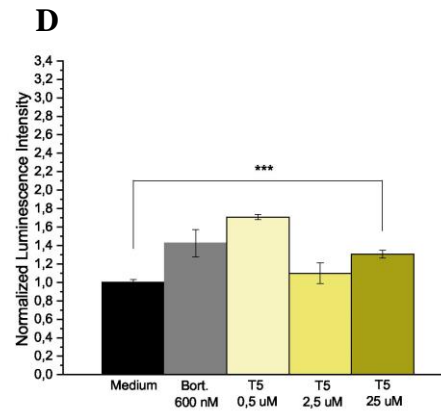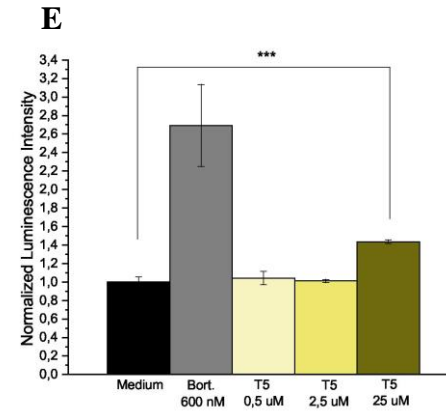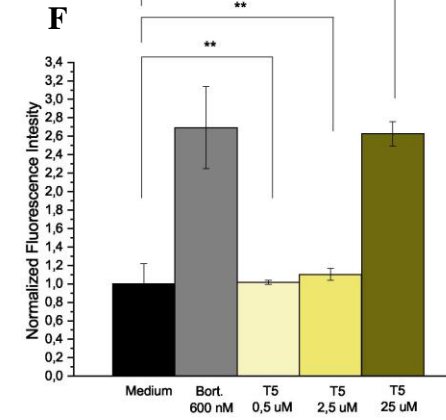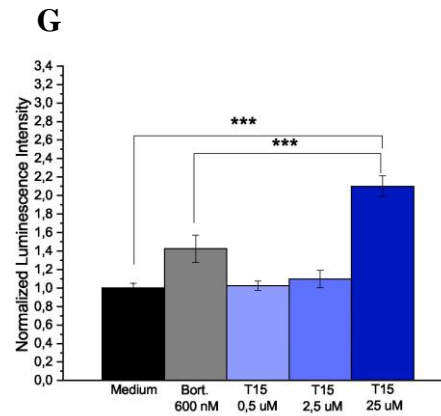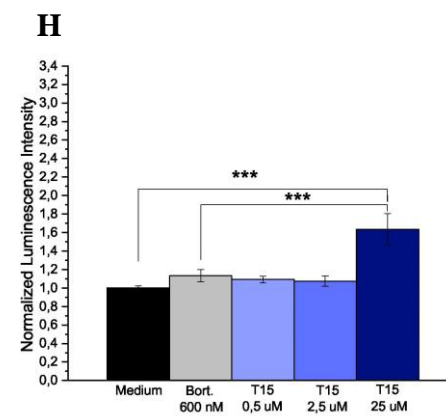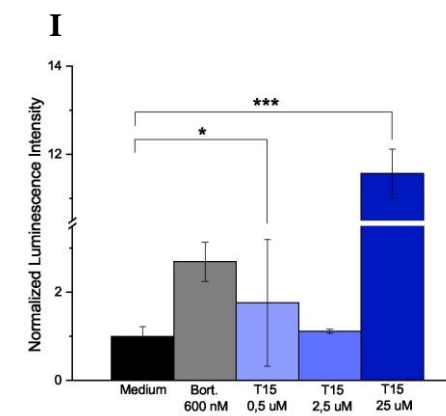

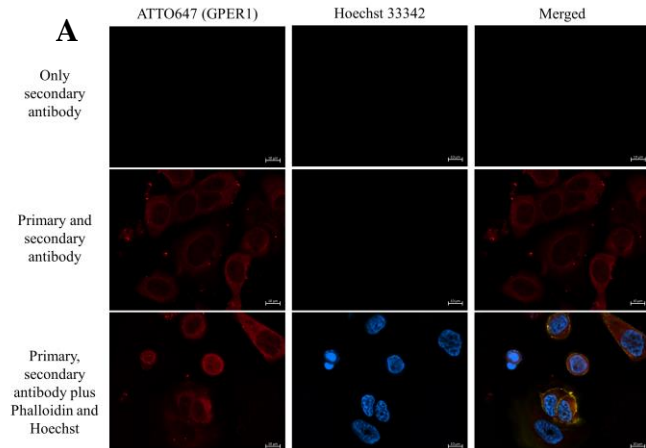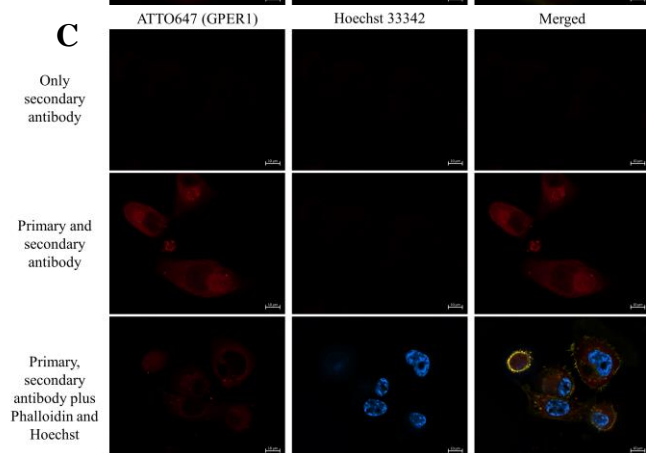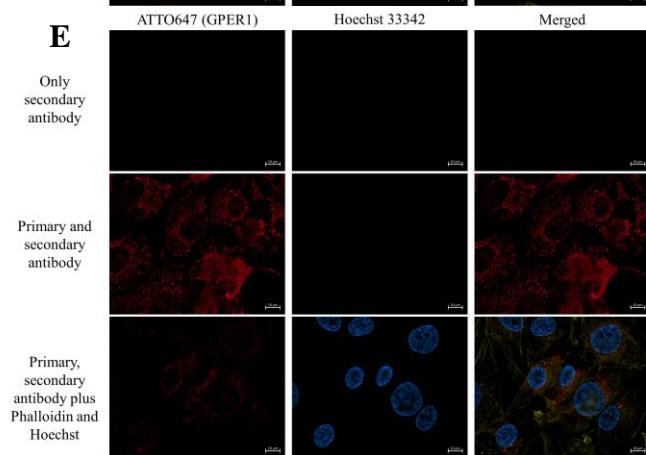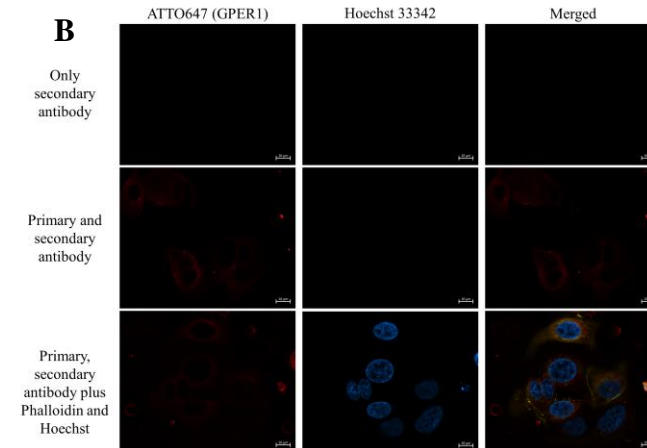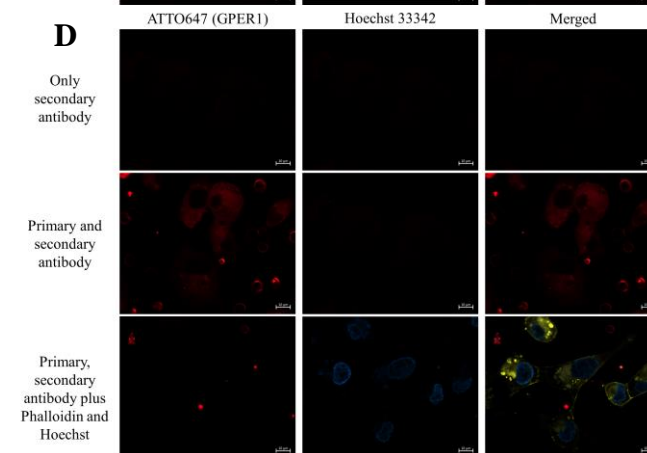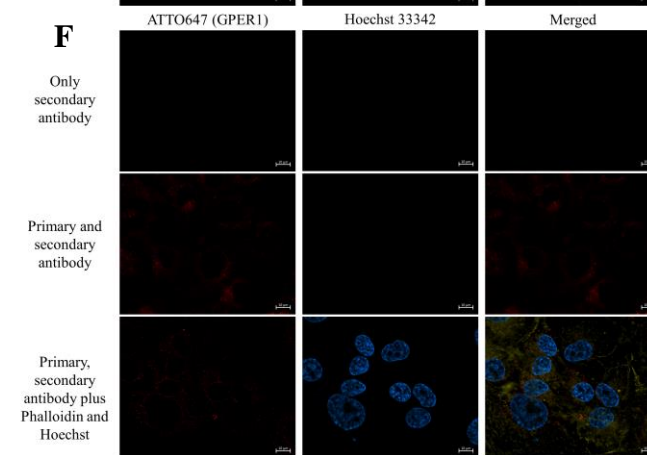

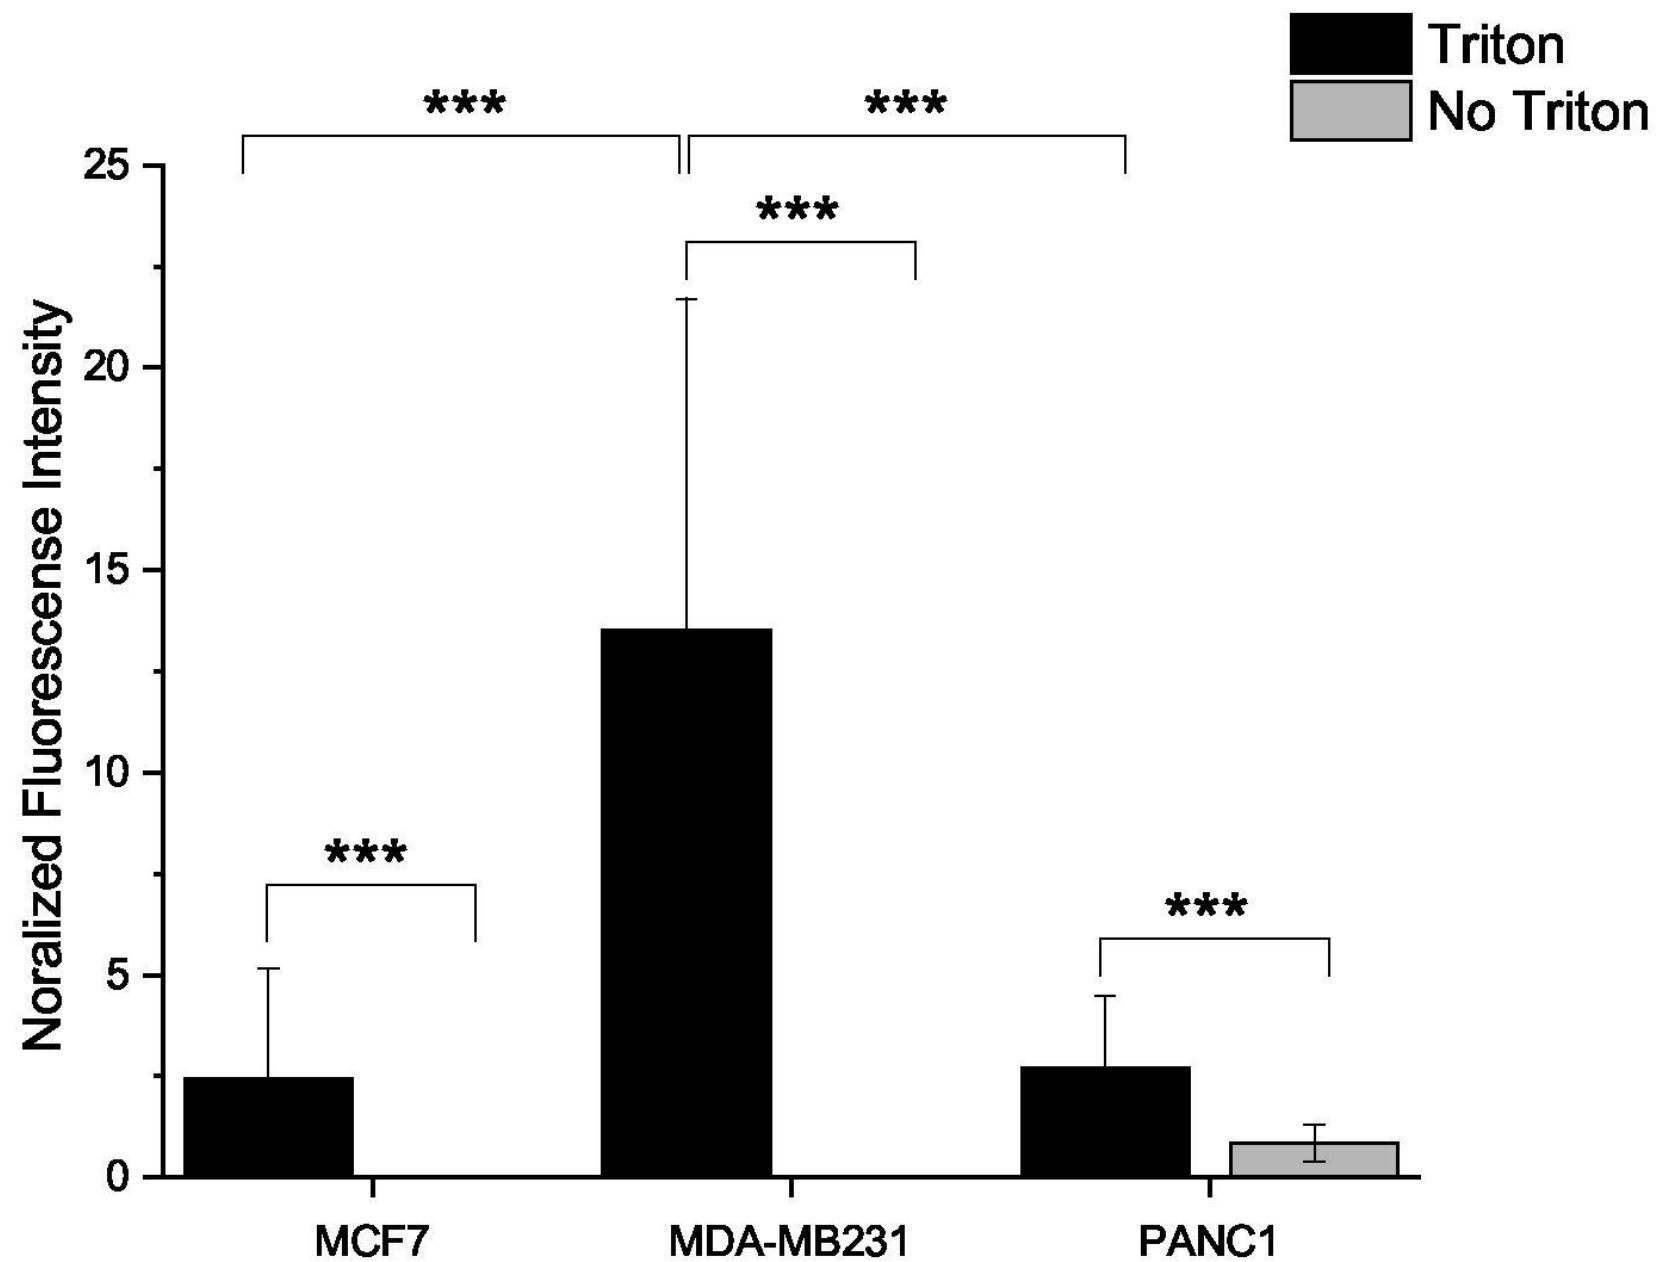

Supplement: Supplementary file 1 [file pharmaceuticals-15-00314-s001.zip › Figure S3.pdf]
